# Supplementary material
Source: PubMed Central journal article supplement (PMC7536839)
Supplement: NIHMS1626819-supplement-Supplementary_Figure_1.pdf [file NIHMS1626819-supplement-Supplementary_Figure_1.pdf]

**eFigure 1: Directed acyclic graph (DAG) showing the effects of time-varying perceived stress on PdG concentrations. Similar DAGs were constructed for the other reproductive hormone outcomes (E2, E1G, FSH, and LH)**

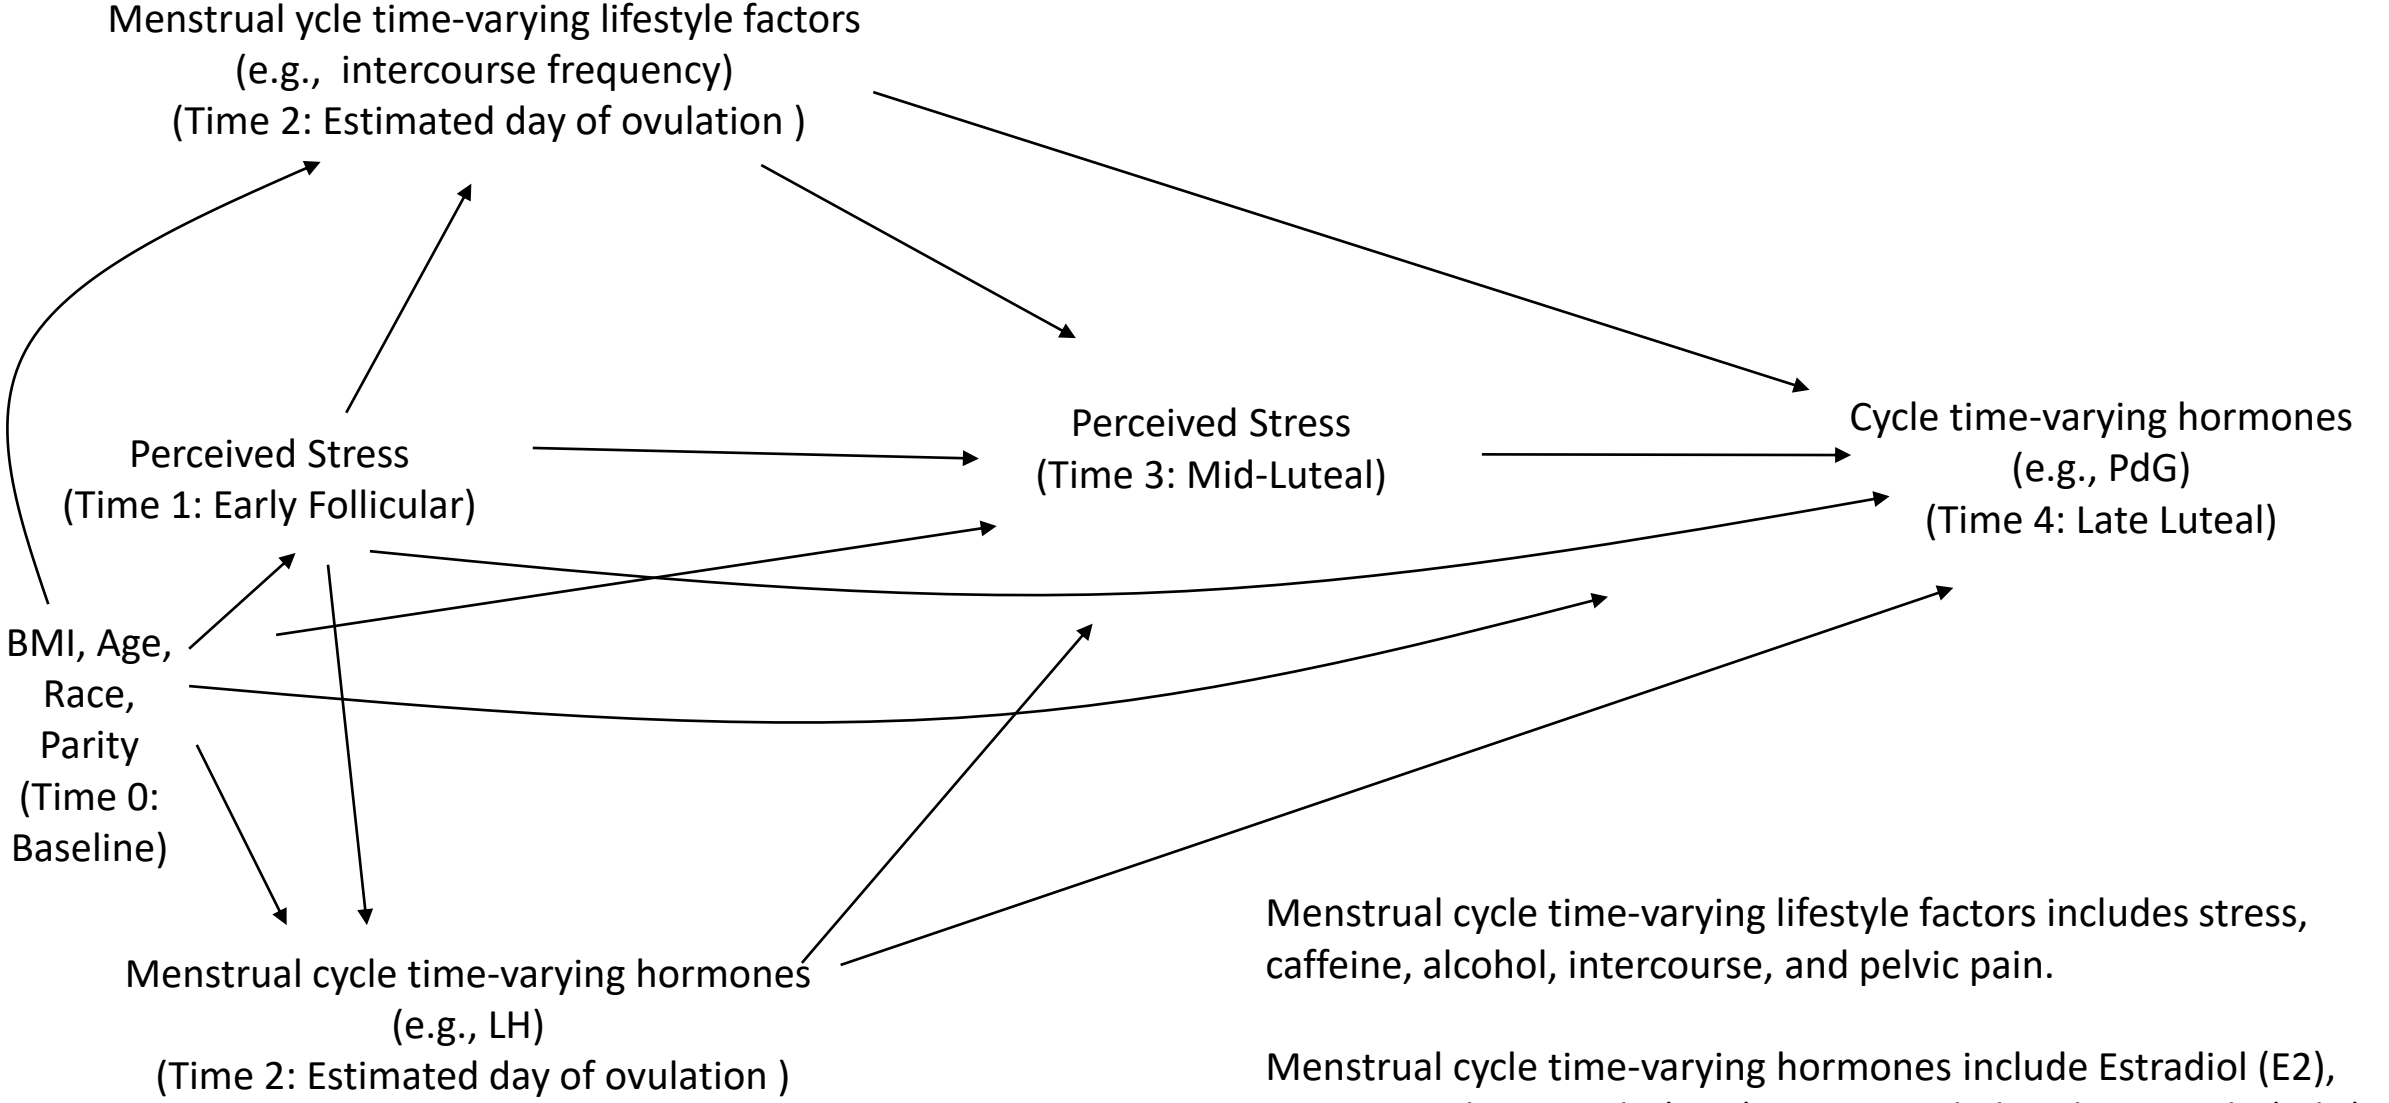

Menstrual cycle time-varying lifestyle factors includes stress, caffeine, alcohol, intercourse, and pelvic pain.

Menstrual cycle time-varying hormones include Estradiol (E2), estrone-1-glucuronide (E1G), pregnanediol-3-glucuronide (PdG), follicle stimulating hormone (FSH), and luteinizing hormone (LH).
