# Supplementary material
Source: PubMed Central journal article supplement (PMC7536839)

**eFigure 3: Mean perceived stress levels (95% CI) across menstrual cycle for first 2 preconception cycles.**

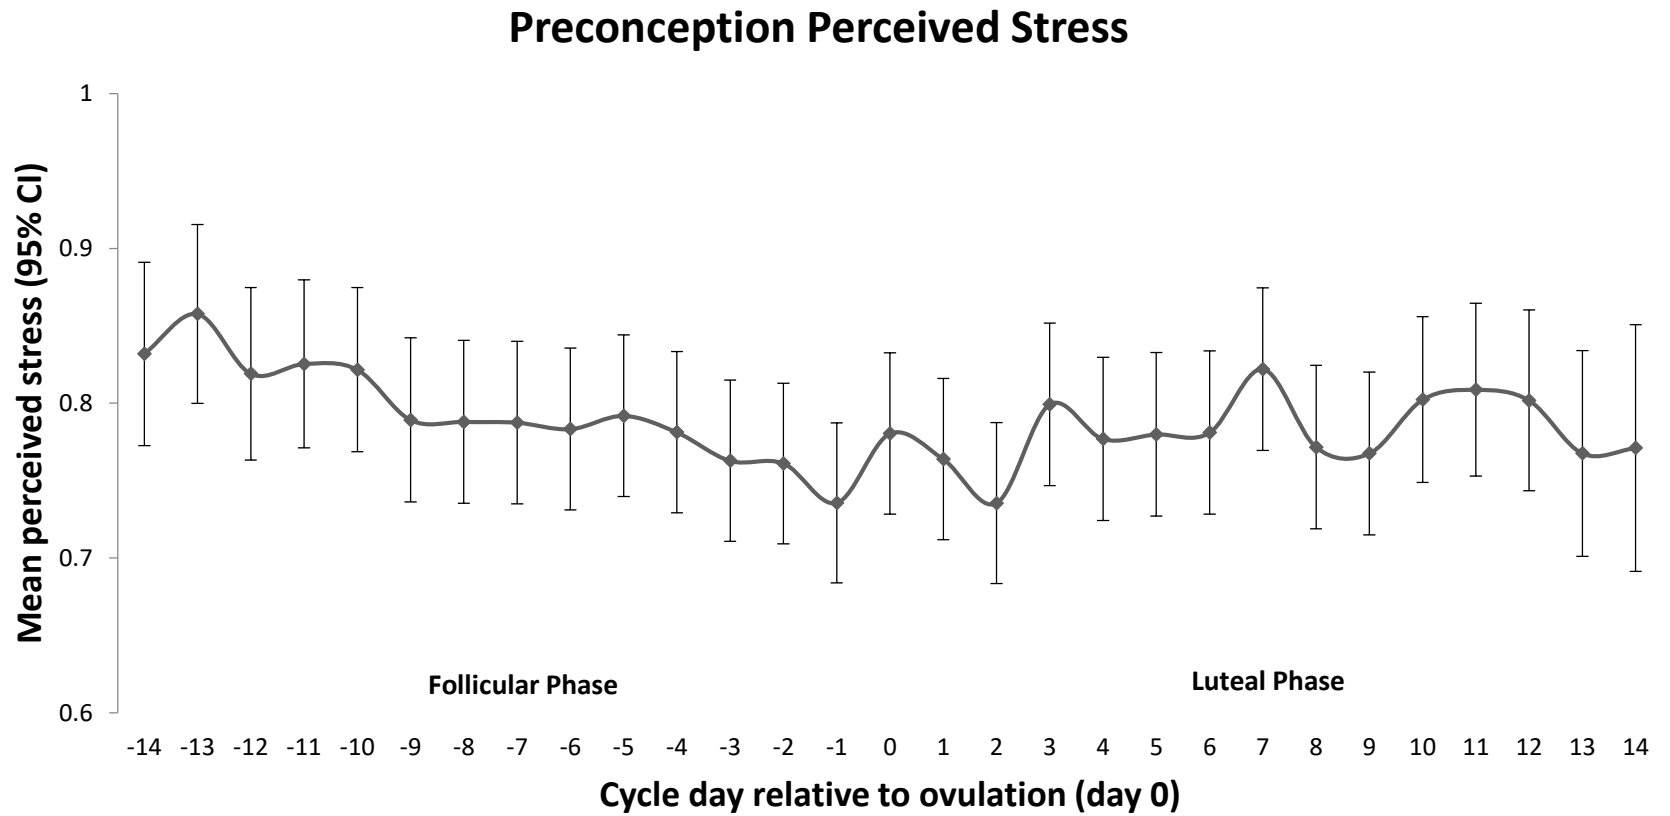

Supplement: NIHMS1626819-supplement-Supplementary_Figure_3.pdf [file NIHMS1626819-supplement-Supplementary_Figure_3.pdf]
